# Supplementary material for: A highly selective colorimetric and “Off–On” fluorescent chemosensor for fluoride ions and its application as a molecular-scale logic device
Source: Royal Society of Chemistry journal article supplement (doi:10.1039/c5nj00918a), 2015-01-01
Supplement: c5nj00918a1.pdf [file c5nj00918a1.pdf]

*Electronic Supplementary Material*

**A highly selective colorimetric and “Off-On” fluorescent  
chemosensor for fluoride ion and its application as a molecular-  
scale logic devices**

GuoTao Yan, Hui Li, Yuan Rong Zhu, BingBing Shi, Wenjuan Qu, Qi Lin, Hong Yao,  
YouMing Zhang, TaiBao Wei<sup>1</sup>

*Key Laboratory of Eco-Environment-Related Polymer Materials of Ministry of Education,  
Gansu Key Laboratory of Polymer Materials, College of Chemistry and Chemical  
Engineering, Northwest Normal University, Lanzhou 730070, China*

---

<sup>1</sup>Fax: +86 9317973191; Tel: +86 9317973191; E-mail: weitaibao@126.com

## Calculation of detection limitation

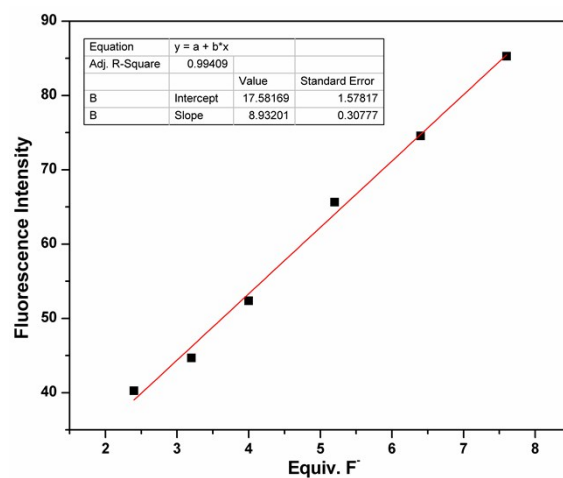

**Fig. S1** Plot of the intensity at 550 nm for a mixture of probe **YT** (20  $\mu$ M) and  $F^-$  in DMSO in the range 0-10 equiv. ( $\lambda_{ex} = 462$  nm).

The result of the analysis as follows:

Linear Equation:  $Y = 8.932 \times X + 17.5816$   $R = 0.99409$

$$S = 0.8932 \times 10^7 \quad \delta = \sqrt{\frac{\sum (F_0 - \bar{F}_0)^2}{N-1}} = 0.7469 \quad (N = 10) \quad K = 3$$

$$LOD = K \times \delta / S = 2.5 \times 10^{-7} \text{ M}$$

$F_0$  is the fluorescence intensity of **YT**

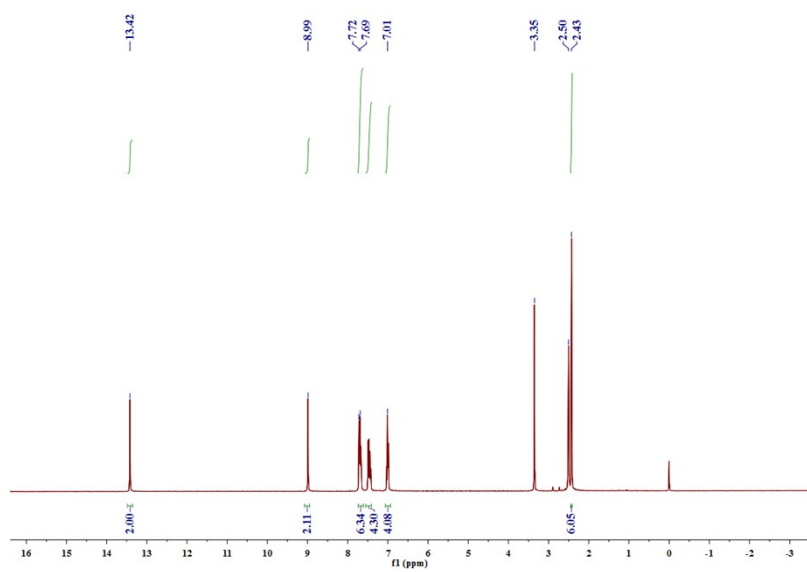

**Fig. S2**  $^1\text{H-NMR}$  spectrum of YT in DMSO.

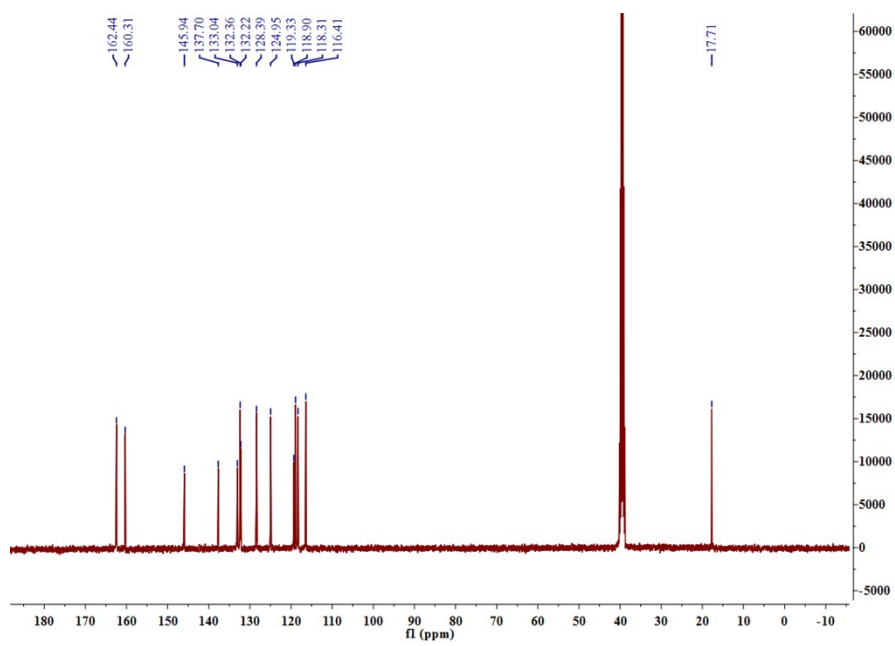

**Fig. S3**  $^{13}\text{C}$ -NMR spectrum of YT in DMSO.

# Generic Display Report

## Analysis Info

Analysis Name D:\Data\yangy\new\YANGUOTAO141226\_1\_19\_01\_1207.d  
Method POS\_100-1200\_For LC.m  
Sample Name YANGUOTAO141226\_1  
Comment

Acquisition Date 12/26/2014 4:14:01 PM  
Operator LZU  
Instrument micrOTOF

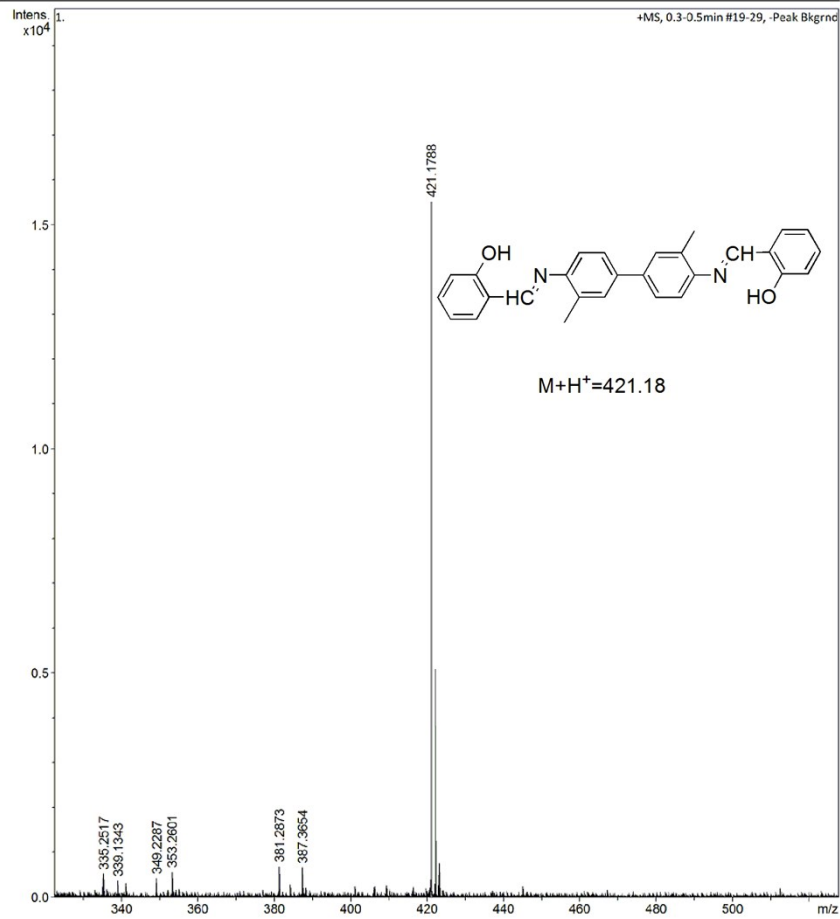

**Fig. S4** ESI-MS spectrum of **YT** in DMSO.

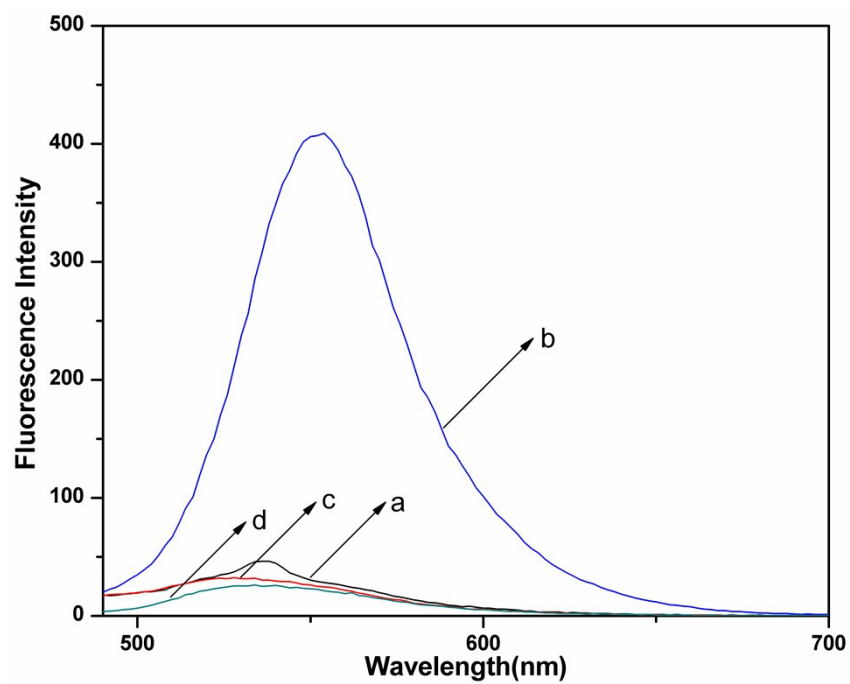

**Fig. S5.** Fluorescence spectra of a) YT (20  $\mu$ M), b) YT + F<sup>-</sup> (50 equiv) in DMSO, c) YT + F<sup>-</sup> (50 equiv) in DMSO/H<sub>2</sub>O, (9:1, v/v). d) YT + F<sup>-</sup> (50 equiv) in DMSO/H<sub>2</sub>O (9:1, v/v, containing 0.01 M HEPES buffer, pH = 7.20).
